# Supplementary material for: Impact of leakage current and electrolysis on FET flow control and pH changes in nanofluidic channels
Source: Royal Society of Chemistry journal article supplement (doi:10.1039/b816384g), 2009-01-01
Supplement: b816384g.pdf [file b816384g.pdf]

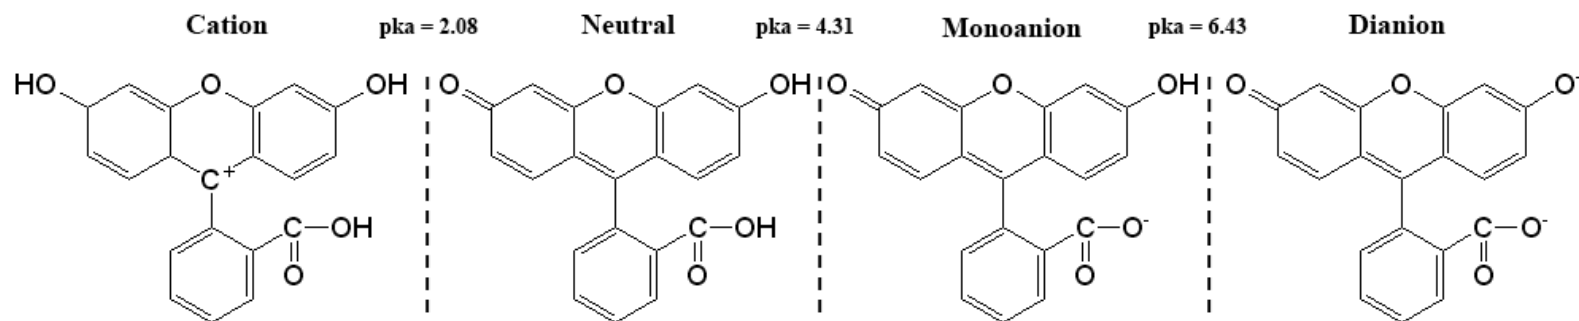

**Electronic Supplementary Information:** Fluorescein molecule's structure strongly depends on the pH of buffer solution. Fluorescein becomes a cation ( $pK_a < 2.08$ ), a neutral molecule ( $pK_a = 2.08 \sim 4.31$ ), an anion ( $pK_a = 4.31 \sim 6.43$ ) or a dianion ( $pK_a > 2.08$ ) by protonation or deprotonation of carboxyl group and OH group on the molecule in response to the pH of buffer solutions.
